# Supplementary material for: Genomic Characterization and gE/gI-Deleted Strain Construction of Novel PRV Variants Isolated in Central China
Source: MDPI journal article supplement (doi:10.3390/v15061237), 2023-05-25
Supplement: s1 [file s1]

## Supplementary Material

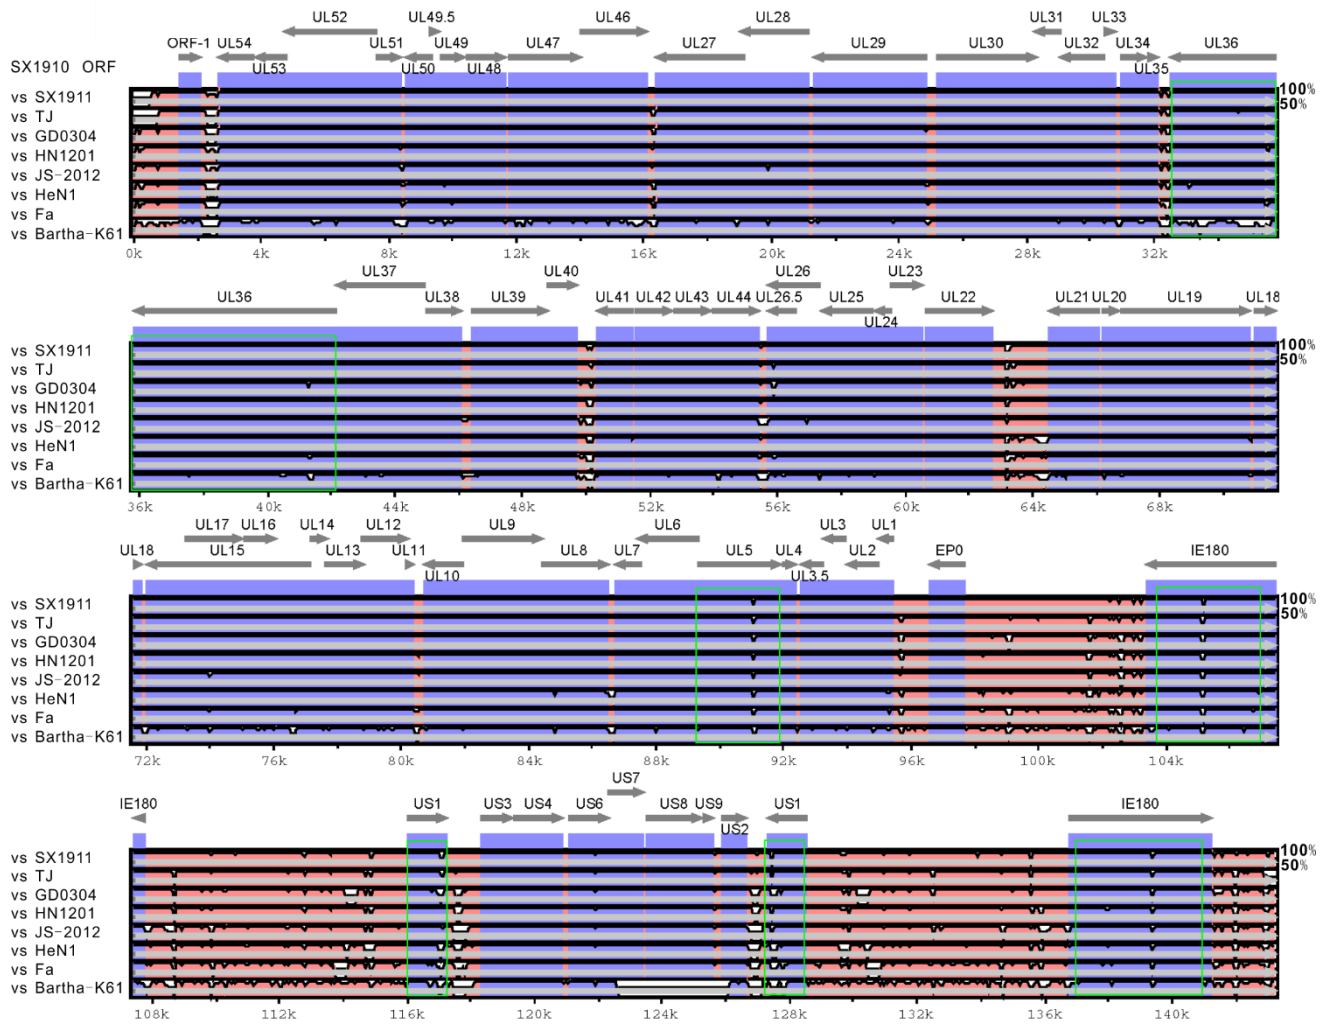

**Supplementary Figure S1. Comparison of the whole-genome sequence conservation between strain SX1910 and other PRV strains.** Conservation scores were calculated from a multiple sequence alignment, and the conservation score between any two genomes was plotted based on a sliding 100 bp window.

**Table S1 Primers for amplification of genes in this study.**

| Primers                 | Sequences (5'-3')                                                                                       | Gene name                |
|-------------------------|---------------------------------------------------------------------------------------------------------|--------------------------|
| gE-F                    | CCGCGGGCCGTGTTCTTTGT                                                                                    | Partial gE gene          |
| gE-R                    | CGTGGCCGTTGTGGGTCAT                                                                                     |                          |
| $\Delta$ gE/gI-GFP-F    | CCCCGCGGGGCTCCTCCTCGCCGCCCTGACAT<br>AACTTCGTATAGCATACATTATACGAAGTTAT<br>TAGTTATTAATAGTAATCAATTACGGGGTC  | $\Delta$ gE/gI -GFP      |
| $\Delta$ gE/gI-GFP-R    | GTCCATTTCGTCACTTCCGGTTTCTCCGGATATA<br>ACTTCGTATAATGTATGCTATACGAAGTTATA<br>GATACATTGATGAGTTTGGACAAACCACA |                          |
| $\Delta$ gE/gI -left-F  | CCGCACCGGGAGGTGGTGA ACTACTGGTAC                                                                         | $\Delta$ gE/gI-left arm  |
| $\Delta$ gE/gI -left-R  | GTCAGGGCGGCGAGGAGGAGCCCCGCGGGGA<br>G                                                                    |                          |
| $\Delta$ gE/gI -right-F | ATCCGGAGAAACCGGAAGTGACGAATGGAC                                                                          | $\Delta$ gE/gI-right arm |
| $\Delta$ gE/gI -right-R | CTACACGTGCCTGGCGACGATGCCCCCGAG                                                                          |                          |

**Table S2 The PRV reference strains used in this study.**

| PRV strains        | Country        | Year | GenBank accession No. |
|--------------------|----------------|------|-----------------------|
| Bartha-K61         | Hungary        | 1961 | JF797217.1            |
| Kaplan             | Hungary        | /    | JF797218.1            |
| NIA3               | United Kingdom | 2008 | KU900059.1            |
| Becker             | USA            | /    | JF797219.1            |
| DUL34Pass          | Germany        | /    | JQ809330.1            |
| ADV32751/Italy2014 | Italy          | 2014 | KU198433.1            |
| Kolchis            | Greece         | 2010 | KT983811.1            |
| PRV-MdBio          | Hungary        | 2017 | LT934125.1            |
| Suid herpesvirus 1 | USA            | 2003 | NC_006151.1           |
| TPA_exp            | USA            | 2003 | BK001744.1            |
| SC                 | China          | 1986 | KT809429.1            |
| Ea                 | China          | 1993 | KU315430.1            |
| LA                 | China          | 1997 | KU552118.1            |
| Fa                 | China          | 1962 | KM189913.1            |
| HNB                | China          | 2012 | KM189914.3            |
| TJ                 | China          | 2012 | KJ789182.1            |
| HNX                | China          | 2012 | KM189912.1            |
| HeN1               | China          | 2012 | KP098534.1            |

Supplementary Material

|                     |       |      |            |
|---------------------|-------|------|------------|
| ZJ01                | China | 2012 | KM061380.1 |
| HLJ8                | China | 2013 | KT824771.1 |
| GD-YH               | China | 2014 | MT197597.1 |
| GD0304              | China | 2015 | MH582511.1 |
| HeNLH/2017          | China | 2017 | MT775883.1 |
| PRV-JM              | China | 2017 | OK338077.1 |
| PRV-GD              | China | 2021 | OK338076.1 |
| CH/GX/PRV/2408/2018 | China | 2018 | MZ219273.1 |
| JS2019              | China | 2019 | MW805231.1 |
| HuBXY/2018          | China | 2018 | MT468549.1 |
| HeNZM/2017          | China | 2017 | MW560175.1 |
| FJ                  | China | 2019 | MW286330.1 |
| HuB17               | China | 2020 | MT949537.1 |
| GD1802              | China | 2020 | MT949535.1 |
| JX/CH/2016          | China | 2016 | MK806387.1 |
| HLJ-2013            | China | 2013 | MK080279.1 |
| DL14/08             | China | 2014 | KU360259.1 |
| HN1201              | China | 2012 | KP722022.1 |
| JS-2012             | China | 2012 | KP257591.1 |
| HB1201              | China | 2012 | KU057086.1 |

|              |       |      |            |
|--------------|-------|------|------------|
| DCD-1        | China | 2017 | OL639029.1 |
| DX           | China | 2012 | MZ063026.1 |
| AnH1/CHN2015 | China | 2015 | MK618718.1 |
| AH02LA       | China | 2011 | KR605320.2 |
| JSY7         | China | 2018 | MT150583.1 |
| JSY13        | China | 2018 | MT157263.1 |
| SD2017       | China | 2017 | MW535260.1 |
| MY-1         | Japan | 2015 | AP018925.1 |
| RC1          | Japan | 2016 | LC342744.1 |
| CZ9          | China | 2019 | MW250653.1 |
| HB1          | China | 2012 | KX443551.1 |
| HD1          | China | 2017 | MF409399.1 |
| JX18-1       | China | 2018 | MN443968.1 |
| GD18-2       | China | 2018 | MN443969.1 |
| JS18         | China | 2018 | MN443970.1 |
| XJ           | China | 2015 | MW893682.1 |
| MQ18         | China | 2018 | MK634306.1 |
| Qihe547      | China | 2014 | KU056477.1 |
| hSD-1/2019   | China | 2019 | MT468550.1 |

---

**Table S3 oligos to construct the sgRNA plasmid used in this study.**

| sgRNA oligos | Sequences (5'-3')        | sgRNA plasmids |
|--------------|--------------------------|----------------|
| gE-sgRNA-F   | CACCCGACGTCTGGTTCCGCGATC | pX335-gE       |
| gE-sgRNA-R   | AAACGATCGCGGAACCAGACGTCG |                |
| gI-sgRNA-F   | CACCGGGTCAGGGCGGCCAGGGTC | pX335-gI       |
| gI-sgRNA-R   | AAACGACCCTGGCCGCCCTGACCC |                |
